# Supplementary material for: HTLV-1 viral oncogene HBZ induces osteolytic bone disease in transgenic mice
Source: PubMed Central journal article supplement (PMC5642476; doi:10.18632/oncotarget.20565), 2017-08-27
Supplement: oncotarget-08-69250-s001.pdf [file oncotarget-08-69250-s001.pdf]

## HTLV-1 viral oncogene HBZ induces osteolytic bone disease in transgenic mice

### SUPPLEMENTARY MATERIALS

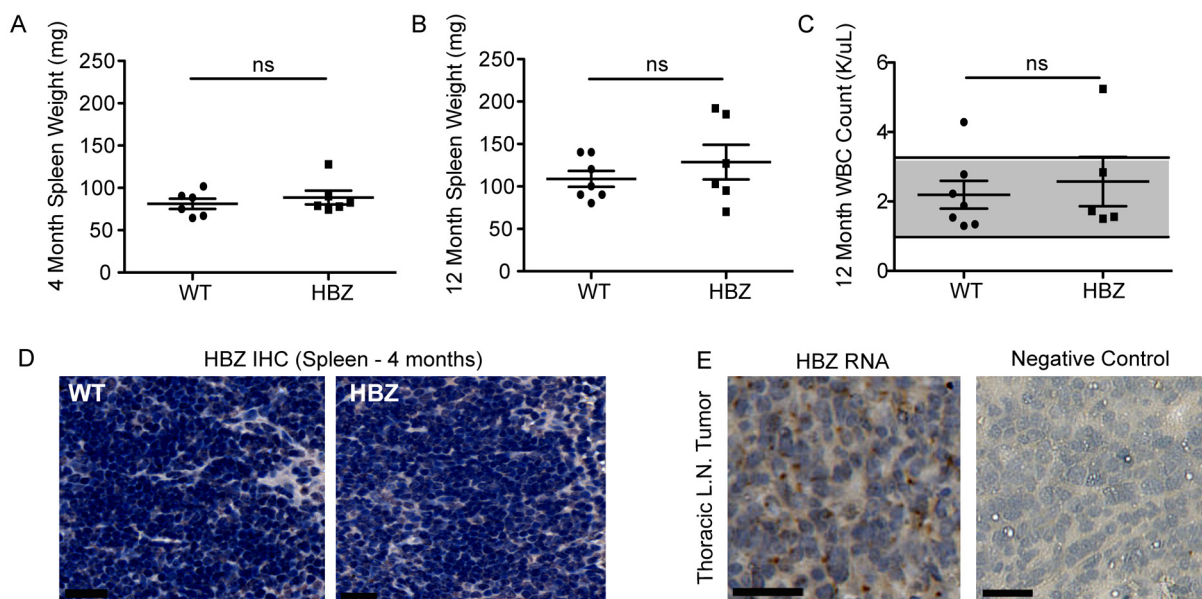

**Supplementary Figure 1: Prior to 18 months of age, Gzmb-HBZ mice do not have lymphoproliferative disease and lack HBZ+ cells in spleen.** Spleen weight of WT (n=6) and Gzmb-HBZ (n=6) mice at 4 (A) and 12 (B) months of age. (C) WT and Gzmb-HBZ white blood cell (WBC) counts at 12 months. (D) Spleen Flag-HBZ IHC in WT and Gzmb-HBZ mice. (E) RNA in situ hybridization of HBZ RNA and negative control E. Coli gene *DapB* on HBZ tumor tissue. All data reported as mean  $\pm$  SEM. Statistical significance determined by unpaired t-test. \* $P \leq 0.05$ , \*\* $P \leq 0.01$ , \*\*\* $P \leq 0.001$ .

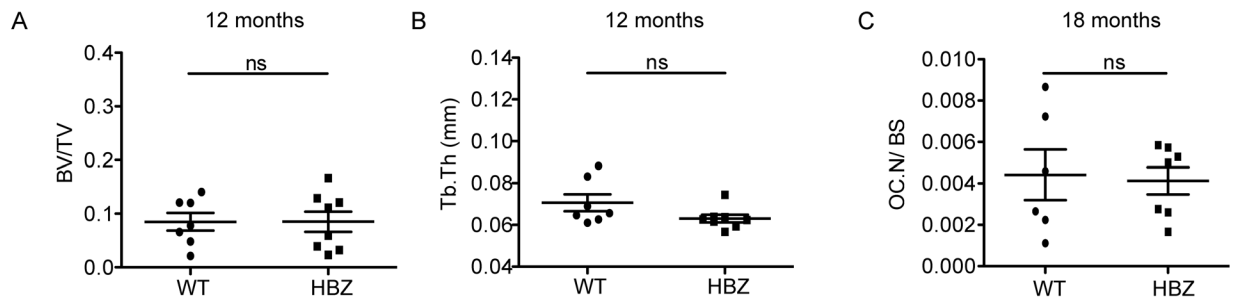

**Supplementary Figure 2: 12-month old Gzmb-HBZ mice have normal bone parameters.** (A) Bone volume/tissue volume (BV/TV) and (B) bone trabecular thickness (Tb.Th) of 12-month old WT and Gzmb-HBZ mice ( $n \geq 6$ ). (C) Osteoclast number/bone surface in WT ( $n=6$ ) and Gzmb-HBZ ( $n=7$ ) tibiae at 18 months of age. All data reported as mean  $\pm$  SEM. Statistical significance determined by unpaired t-test. \* $P \leq 0.05$ , \*\* $P \leq 0.01$ , \*\*\* $P \leq 0.001$ .
